# Supplementary material
Source: PubMed Central journal article supplement (PMC6260327)
Supplement: 10-1055-s-0037-1602802-s1600026.pdf [file 10-1055-s-0037-1602802-s1600026.pdf]

# Survey: Pediatric Early Warning System (PEWS)

Which hospital do you work at?

This is a

- University hospital
- General hospital

**1. Is there a PEWS in use at your pediatric department?**

- Yes
- No

***If YES then:***

**1.1 Which PEWS score do you use at your pediatric department?**

- A validated PEWS score
  - Which PEWS score?
    - Brighton
    - Bristol
    - Yorkshire
    - Parshuram
    - Different:.....
- A non-validated PEWS score in use / made by another hospital
  - Which hospital? .....
- A non-validated PEWS score self-designed for our department
  - Designed by:
    - A pediatrician of the department
    - All the pediatricians of the department
    - A pediatrician and an ER-doctor
    - A pediatrician and a nurse
    - A nurse
    - Different: .....
- I don't know

**1.2 Which parameters are used in your PEWS score? (You can complement the list if your PEWS parameters are not all described below)**

- Heart rate
- Blood pressure
- Respiratory frequency

- Oxygen saturation
- Oxygen therapy
- Capillary refill
- Respiratory effort
- Temperature
- Consciousness
- Convulsion
- Nurse's worried signs
- Parents' worried signs
- Other parameters: .....

**1.3 What is the next step (step-up care) when the PEWS score is elevated / exceeds the established threshold?**

- There is no next step
- Call the doctor / resident who is on call
- Call the resuscitation team or rapid response team
- Different: .....

**1.4 Are you satisfied with how the PEWS score is functioning at the pediatric department?**

- Yes
- No

**1.5 Are the nurses satisfied with how the PEWS score is functioning at the pediatric department?**

- Yes
- No

**1.6 Why did you implement a PEWS at the pediatric department?**

- Because of the strict advice that was given in the SMS safety program in 2011
- After a severe incident at the pediatric department
- There is a need for better monitoring of the clinical course
- Different: .....

***If NO then:***

**1.1 Are you planning to implement a PEWS at your pediatric department?**

- Yes
- No

***If YES then:***

**1.2 Which PEWSscore are you planning to implement at your pediatric department?**

- 
- A validated PEWS score

Which PEWS score?

- Brighton
- Bristol
- Yorkshire
- Parshuram
- Different:.....
- A non-validated PEWS score in use / made by another hospital

Which hospital?.....

- A non-validated PEWS score self-designed for our department

Designed by:

- A pediatrician of the department
- All the pediatricians of the department
- A pediatrician and an ER-doctor
- A pediatrician and a nurse
- A nurse
- Different: .....
- I don't know

**2. Is there a PEWS score in use at your ER?**

- Yes
- No

***If YES then***

**2.1 Which PEWS score do you use at your ER?**

- A validated PEWS score

Which PEWS score?

- Brighton
- Bristol
- Yorkshire
- Parshuram
- Different:.....

- A non-validated PEWS score in use / made by another hospital

Which hospital? .....

- A non-validated PEWS score self-designed for our department

Designed by:

- A pediatrician of the department
- All the pediatricians of the department
- A pediatrician and an ER-doctor
- A pediatrician and a nurse
- A nurse
- Different: .....
- I don't know

**1.2 Which parameters are used in your PEWS score? (You can complement the list if your PEWS parameters are not all described below)**

- Heart rate
- Blood pressure
- Respiratory frequency
- Oxygen saturation
- Oxygen therapy
- Capillary refill
- Respiratory effort
- Temperature
- Consciousness
- Convulsion
- Nurse's worried signs
- Parents' worried signs
- Other parameters: .....

**1.3 What is the next step (step-up care) when the PEWS score is elevated / exceeds the established threshold?**

- There is no next step
- Call the doctor / resident who is on call
- Call the resuscitation team or rapid response team
- Different: .....

**1.4 Are you satisfied with how the PEWS score is functioning at the pediatric department?**

- Yes
- No

**1.5 Are the nurses satisfied with how the PEWS score is functioning at the pediatric department?**

- Yes
- No

**1.6 Why did you implement a PEWS at the pediatric department?**

- Because of the strict advice that was given in the SMS safety program in 2011
- After a severe incident at the pediatric department
- There is a need for better monitoring of the clinical course
- Different: .....

***If NO then***

**2.1 Are you planning to implement a PEWS score at your ER?**

- Yes
- No

**2.2 Which PEWS score are you planning to implement at your ER?**

- A validated PEWS score
  - Which PEWS score?
    - Brighton
    - Bristol
    - Yorkshire
    - Parshuram
    - Different:.....
- A non-validated PEWS score in use / made by another hospital
  - Which hospital? .....
- A non-validated PEWS score self-designed for our department
  - Designed by:
    - A pediatrician of the department
    - All the pediatricians of the department
    - A pediatrician and an ER-doctor
    - A pediatrician and a nurse
    - A nurse
    - Different: .....
- I don't know

**3. If there is a PEWS score available that is validated for the Dutch hospitals (general and university), would you use this validated PEWS score?**

- Yes, at our pediatric department
- Yes, at our ER
- Yes, at our pediatric department and ER
- No
